# Supplementary material for: 2D-Graph of intermolecular interactions predicts radical character of anion–π* type charge-transfer complexes
Source: Royal Society of Chemistry journal article supplement (doi:10.1039/d3ra07729b), 2024-01-01
Supplement: d3ra07729b2.pdf [file d3ra07729b2.pdf]

## Supporting Information for

# 2D-Graph of Intermolecular Interactions Predicts Radical Character of Anion- $\pi^*$ Type of Charge-Transfer Complexes

*Zhenda Lin,<sup>†</sup> Hao Su,<sup>†</sup> Wenhuan Huang,<sup>†</sup> Xuepeng Zhang,<sup>\*†</sup> and Guoqing Zhang<sup>\*†</sup>*

<sup>†</sup>Hefei National Research Center for Physical Sciences at the Microscale, University  
of Science and Technology of China, Hefei, 230026, China

### **Corresponding Author**

\*zhangxp@ustc.edu.cn

\*gzhang@ustc.edu.cn

# 1. Calculation

## 1.1 General calculation method

For all combinations, the theoretical calculation (including optimization, vibrational analysis and single point energy calculation) is taken at b3lyp/6-311+G(d,p) level with empirical dispersion(D3BJ). Among them, the combination at transition state, we checked that only one negative vibrational frequency exists, while the combinations without a transition state, none of the vibrational frequency is negative.

The overlap integral is calculated using the Multiwfn software pack (version 3.7) following the steps in the user manual(see 4.100.15 Calculate intermolecular orbital overlap integral of DB-TTF<sup>[1]</sup>), since the phase of (all)MOs in one certain molecular is arbitrary, the absolute value is used as the final result.

For some combinations with a 'cb-' notation in the A2 section, we made an imaginary reaction to form the molecular: the donor and acceptor moiety is placed at the actual position of the entirety, then the  $E_{DA}$  and  $S_{DA}$  is calculated as described above.

All of the calculation files can be accessed at: <https://rec.ustc.edu.cn/share/697593f0-7043-11eb-9dc4-e13a4ed23fee>

## 2. Results

### 2.1 Combinations in A1 section

| Combination Name                     | Serial Number | Donor                                                                             | Acceptor                                                                           | $E_{DA}$ (in eV) | $S_{DA}$ | Explanation                                                                                                                                  |
|--------------------------------------|---------------|-----------------------------------------------------------------------------------|------------------------------------------------------------------------------------|------------------|----------|----------------------------------------------------------------------------------------------------------------------------------------------|
| TS-DA                                | A1_1          |  |   | -5.263           | 0.233    | [4+2], classic non-substituted Diels-Alder addition reaction                                                                                 |
| TS_AD-BH3_ene                        | A1_2          |  | H <sub>2</sub> B-H                                                                 | -3.471           | 0.242    | Transition state for an addition reaction                                                                                                    |
| ct-NH <sub>3</sub> _BH <sub>3</sub>  | A1_3          | NH <sub>3</sub>                                                                   | BH <sub>3</sub>                                                                    | -4.595           | 0.340    | Coordination of H <sub>3</sub> N-BH <sub>3</sub>                                                                                             |
| cb-BF <sub>3</sub> _NMe <sub>3</sub> | A1_4          |  | BF <sub>3</sub>                                                                    | -2.623           | 0.345    | Coordination of Me <sub>3</sub> N-BF <sub>3</sub>                                                                                            |
| TS_AD-3_2                            | A1_5          |  | $\ominus - \text{N} \equiv \text{N}^{\oplus}$                                      | -2.433           | 0.263    | Transition state for a [3+2] addition reaction, see <i>The art of writing reasonable organic reaction mechanisms</i> <sup>[2]</sup> page 225 |
| cb-BOH <sub>3</sub> _NH <sub>3</sub> | A1_6          | NH <sub>3</sub>                                                                   |   | -5.858           | 0.285    | The HOMO energy of NH <sub>3</sub> is low (at -0.27 a.u.), which results in a large negative value.                                          |
| cb-BF <sub>3</sub> _NH <sub>3</sub>  | A1_7          | NH <sub>3</sub>                                                                   |  | -4.213           | 0.389    | The HOMO energy of NH <sub>3</sub> is low (at -0.27 a.u.), which results in a large negative value.                                          |

### 2.2 Combinations in A2 section

| Combination Name                                            | Serial Number | Donor                                                                               | Acceptor                                                                            | $E_{DA}$ (in eV) | $S_{DA}$ | Explanation                                                                                                                             |
|-------------------------------------------------------------|---------------|-------------------------------------------------------------------------------------|-------------------------------------------------------------------------------------|------------------|----------|-----------------------------------------------------------------------------------------------------------------------------------------|
| TS_AD-Et_ea                                                 | A2_1          | H <sub>3</sub> C-CH <sub>2</sub> <sup>⊖</sup>                                       | 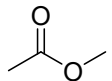 | 5.523            | 0.285    | Transition state of a carbanion - carbonyl addition reaction                                                                            |
| TS_AD-H <sub>2</sub> CF <sub>3</sub> Tone_EtNH <sub>2</sub> | A2_2          |  |  | 7.199            | 0.323    | Transition state of an amine - activated carbonyl addition reaction                                                                     |
| cb-ea                                                       | A2_3          | O <sup>⊖</sup>                                                                      |  | 13.402           | 0.213    | Reaction forming ethyl acetate from two ionic fragments                                                                                 |
| TS-RO                                                       | A2_4          | S <sup>⊖</sup>                                                                      |  | 2.266            | 0.206    | Transition state for the a ring-opening reaction                                                                                        |
| TS_AD-PhCHO_CN                                              | A2_5          | CN <sup>⊖</sup>                                                                     |  | 1.905            | 0.322    | Transition state between cyanide anion and benzaldehyde                                                                                 |
| TS_AD-MeCN_Me                                               | A2_6          | CH <sub>3</sub> <sup>⊖</sup>                                                        | -CN                                                                                 | 4.309            | 0.261    | Transition state for an addition reaction (see <i>The art of writing reasonable organic reaction mechanisms</i> <sup>[2]</sup> page 83) |
| cb_iPH <sub>3</sub>                                         | A2_7          | PH <sub>2</sub> <sup>⊖</sup>                                                        | H <sup>+</sup>                                                                      | 14.555           | 0.551    | Ionic reaction forming PH <sub>3</sub>                                                                                                  |
| cb-2CF <sub>3</sub> 2T                                      | A2_8          |  | H <sup>+</sup>                                                                      | 12.275           | 0.549    | Neutralization reaction between an anion and a proton in vacuum                                                                         |

|             |       |                                                                                     |                |        |       |                                                                          |
|-------------|-------|-------------------------------------------------------------------------------------|----------------|--------|-------|--------------------------------------------------------------------------|
| cb-3NO2Ar   | A2_9  | 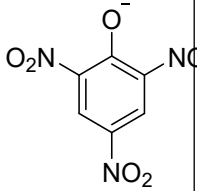   | H <sup>+</sup> | 10.489 | 0.274 | Neutralization reaction between an anion and a proton in vacuum          |
| cb-4me6crNH | A2_10 |    | H <sup>+</sup> | 14.589 | 0.351 | Neutralization reaction between an anion and a proton in vacuum          |
| cb-5cAr     | A2_11 |    | H <sup>+</sup> | 13.956 | 0.533 | Neutralization reaction between an anion and a proton in vacuum          |
| cb-5crOH    | A2_12 |    | H <sup>+</sup> | 6.892  | 0.248 | Neutralization reaction between a THF and a proton in vacuum             |
| cb-5crSH    | A2_13 |    | H <sup>+</sup> | 7.726  | 0.470 | Neutralization reaction between a TFT and a proton in vacuum             |
| cb-CH3OH    | A2_14 |    | H <sup>+</sup> | 14.984 | 0.414 | Neutralization reaction between an anion and a proton in vacuum          |
| cb-F3CSO3H  | A2_15 |    | H <sup>+</sup> | 11.508 | 0.358 | Neutralization reaction between an anion and a proton in vacuum          |
| cb-H2NPh    | A2_16 |   | H <sup>+</sup> | 13.999 | 0.243 | Neutralization reaction between an anion and a proton in vacuum          |
| cb-H3PO4    | A2_17 |  | H <sup>+</sup> | 12.529 | 0.357 | Neutralization reaction between a phosphoric acid and a proton in vacuum |
| cb-HCF3     | A2_18 |  | H <sup>+</sup> | 14.925 | 0.672 | Neutralization reaction between an anion and a proton in vacuum          |
| cb-HCN      | A2_19 |  | H <sup>+</sup> | 12.366 | 0.666 | Neutralization reaction between an anion and a proton in vacuum          |
| cb-itBuH    | A2_20 |  | H <sup>+</sup> | 15.263 | 0.598 | Neutralization reaction between an anion and a proton in vacuum          |
| cb-iCH4     | A2_21 |  | H <sup>+</sup> | 15.411 | 0.651 | Neutralization reaction between an anion and a proton in vacuum          |

## 2.3 Combinations in B1 section

| Combination Name | Serial Number | Donor                                                                               | Acceptor                                                                            | $E_{DA}$ (in eV) | $S_{DA}$ | Explanation                                                                          |
|------------------|---------------|-------------------------------------------------------------------------------------|-------------------------------------------------------------------------------------|------------------|----------|--------------------------------------------------------------------------------------|
| HB-CH4_NH3       | B1_1          | NH <sub>3</sub>                                                                     | CH <sub>4</sub>                                                                     | -7.635           | 0.137    | Hydrogen bond between donor and acceptor                                             |
| HB-H2O           | B1_2          |  |  | -9.283           | 0.153    | Hydrogen bond between donor and acceptor                                             |
| HB-EtOH_H2O      | B1_3          |  |  | -8.222           | 0.116    | Hydrogen bond between donor and acceptor                                             |
| HB-H2O_Cl        | B1_4          | Cl <sup>-</sup>                                                                     |  | -1.158           | 0.180    | Hydrogen bond between donor and acceptor                                             |
| HB-H2O_HF        | B1_5          |  | HF                                                                                  | -8.706           | 0.191    | Hydrogen bond between donor and acceptor                                             |
| HB-NH3_NH3       | B1_6          | NH <sub>3</sub>                                                                     | NH <sub>3</sub>                                                                     | -7.676           | 0.177    | Hydrogen bond between donor and acceptor                                             |
| HB-SH2_SH2       | B1_7          |  |  | -7.023           | 0.182    | Hydrogen bond between donor and acceptor                                             |
| TS_SN2-CH3Br_NH3 | B1_8          | NH <sub>3</sub>                                                                     |  | -6.553           | 0.158    | Transition state in the S <sub>N</sub> 2 reaction between ammonia and methyl bromide |

|                    |       |                  |     |        |       |                                       |
|--------------------|-------|------------------|-----|--------|-------|---------------------------------------|
| wNCBI-CH3Cl CH3NH2 | B1_9  | —NH <sub>2</sub> | —Cl | -6.294 | 0.169 | Weak non-chemical bonding interaction |
| wNCBI-CH3Br CH3NH2 | B1_10 | —NH <sub>2</sub> | —Br | -5.762 | 0.135 | Weak non-chemical bonding interaction |
| wNCBI-CH3F CH3NH2  | B1_11 | —NH <sub>2</sub> | —F  | -6.787 | 0.147 | Weak non-chemical bonding interaction |

## 2.4 Combinations in B2 section

| Combination Name | Serial Number | Donor           | Acceptor | $E_{DA}$ (in eV) | $S_{DA}$ | Explanation                                                                                                  |
|------------------|---------------|-----------------|----------|------------------|----------|--------------------------------------------------------------------------------------------------------------|
| ours-NNI_2       | B2_1          |                 |          | 3.236            | 0.164    | The lone pair on the carbanion is arbitrarily position to “connect” to the 4-position in the NNI derivatives |
| ours-NNI_3       | B2_2          |                 |          | 3.410            | 0.166    | The lone pair on the carbanion is arbitrarily position to “connect” to the 4-position in the NNI derivatives |
| ours-NNI_1       | B2_3          |                 |          | 3.190            | 0.155    | The lone pair on the carbanion is arbitrarily position to “connect” to the 4-position in the NNI derivatives |
| ours-NNI_4       | B2_4          |                 |          | 3.647            | 0.161    | The lone pair on the carbanion is arbitrarily position to “connect” to the 4-position in the NNI derivatives |
| ours-NNI_7       | B2_5          |                 |          | 3.475            | 0.165    | The lone pair on the carbanion is arbitrarily position to “connect” to the 4-position in the NNI derivatives |
| ours-NNI_9       | B2_6          |                 |          | 3.613            | 0.164    | The lone pair on the carbanion is arbitrarily position to “connect” to the 4-position in the NNI derivatives |
| ours-NNI_nBu     | B2_7          |                 |          | 5.217            | 0.175    | The lone pair on the carbanion is arbitrarily position to “connect” to the 4-position in the NNI derivatives |
| TS_SNAr-CITNT_OH | B2_8          | OH <sup>-</sup> |          | 7.196            | 0.157    | Transition state for the SNAr reaction, forming a sigma complex                                              |
| ours-NNI_tBuO    | B2_9          |                 |          | 4.123            | 0.102    | The lone pair on the oxide is arbitrarily position to “connect” to the 4-position in the NNI derivatives     |

|                        |       |                                                                                   |                                                                                   |       |       |                                                                                                              |
|------------------------|-------|-----------------------------------------------------------------------------------|-----------------------------------------------------------------------------------|-------|-------|--------------------------------------------------------------------------------------------------------------|
| TS_SN2-OH_CH3Cl        | B2_10 |  |  | 1.966 | 0.102 | Transition state for an S <sub>N</sub> 2 reaction                                                            |
| ours-NNI_CCl3          | B2_11 |  |  | 3.286 | 0.193 | The lone pair on the carbanion is arbitrarily position to “connect” to the 4-position in the NNI derivatives |
| ours-NNI_Ph2C_stacking | B2_12 |  |  | 3.773 | 0.165 | The lone pair on the carbanion is arbitrarily position to “connect” to the 4-position in the NNI derivatives |
| ours-NNI_PhC           | B2_13 |  |  | 4.326 | 0.167 | The lone pair on the carbanion is arbitrarily position to “connect” to the 4-position in the NNI derivatives |
| ours-PyPh_PhMe         | B2_14 |  |  | 8.552 | 0.194 | The lone pair on the carbanion is arbitrarily position to “connect” to the 4-position in the NNI derivatives |

## 2.5 Combinations in C1 section

| Combination Name        | Serial Number | Donor                                                                               | Acceptor                                                                            | $E_{DA}$ (in eV) | $S_{DA}$      | Explanation                                                           |
|-------------------------|---------------|-------------------------------------------------------------------------------------|-------------------------------------------------------------------------------------|------------------|---------------|-----------------------------------------------------------------------|
| NCBIw-dimer_naphthalene | C1_1          | 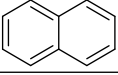 |  | -4.755           | 0.0249        | Weak non-chemical bonding interactions: $\pi$ - $\pi$ stacking        |
| wNCBI-2PhH              | C1_2          |  |  | -6.607           | 0.0649        | Weak non-chemical bonding interactions: $\pi$ - $\pi$ stacking        |
| wNCBI-2CH4              | C1_3          | CH <sub>4</sub>                                                                     | CH <sub>4</sub>                                                                     | -11.016          | 0.0000<br>301 | Weak non-chemical bonding interactions: van der Waals force           |
| cpi-NH4_HPh             | C1_4          |  | <sup>+</sup> NH <sub>4</sub>                                                        | -0.642           | 0.0000<br>970 | Strong non-chemical bonding interactions: cation- $\pi$ interaction   |
| cpi-Li_HPh              | C1_5          |  | Li <sup>+</sup>                                                                     | -0.104           | 0.0000<br>510 | Strong non-chemical bonding interactions: cation- $\pi$ interaction   |
| cpi-Ar_menh3            | C1_6          |  | <sup>+</sup> NH <sub>3</sub>                                                        | -1.138           | 0.0014<br>4   | Moderate non-chemical bonding interactions: cation- $\pi$ interaction |
| wNCBI-2PhBr             | C1_7          |  |  | -6.040           | 0.0344        | Weak non-chemical bonding interactions: cation- $\pi$ interaction     |
| ct-py_tene              | C1_8          |  |  | -0.354           | 0.0373        | Strong non-chemical bonding interactions: cation- $\pi$ interaction   |

## 2.6 Combinations in C2 section

| Combination Name      | Serial Number | Donor                                                                               | Acceptor                                                                            | $E_{DA}$ (in eV) | $S_{DA}$ | Explanation                                                                                                                             |
|-----------------------|---------------|-------------------------------------------------------------------------------------|-------------------------------------------------------------------------------------|------------------|----------|-----------------------------------------------------------------------------------------------------------------------------------------|
| ct-Tetracene_TCNQ     | C2_1          | 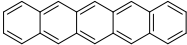   |    | 0.0235           | 0.0447   | Charge transfer complex, charge transfers from donor to acceptor                                                                        |
| ct-TTF_TCNQ           | C2_2          |    |    | 0.503            | 0.0223   | Charge transfer complex, charge transfers from donor to acceptor                                                                        |
| ct-per_4F2CN6Cr       | C2_3          |    |    | 0.467            | 0.0425   | Charge transfer complex, charge transfers from donor to acceptor                                                                        |
| ct-pentacene_4F2CN6Cr | C2_4          |    |    | 0.837            | 0.0171   | Charge transfer complex, charge transfers from donor to acceptor                                                                        |
| ct-DBTTF_4F2CN6Cr     | C2_5          |    |    | 0.924            | 0.0360   | Charge transfer complex, charge transfers from donor to acceptor                                                                        |
| ct-2MeNPh_4NO22CN6Cr  | C2_6          |    |    | 2.509            | 0.0627   | Charge transfer complex, charge transfers from donor to acceptor                                                                        |
| ct-2MeNPh_4F2CN6Cr    | C2_7          |   |   | 1.491            | 0.0690   | Charge transfer complex, charge transfers from donor to acceptor                                                                        |
| ours-NNI_PhO          | C2_8          |  |  | 3.209            | 0.00834  | Similar to the combinations in the B2 section, but the overlap integral is rather small                                                 |
| TS E2-CH3Br_OH        | C2_9          | $\text{OH}^-$                                                                       |  | 2.545            | 0.0853   | This calculation suggests that OH- transfers an electron to acceptor's LUMO at the transition state during the E2 elimination in vacuum |
| ours-NNI_Ph3C         | C2_10         |  |  | 2.724            | 0.0317   | Defined as "frustrated Lewis Pair"                                                                                                      |
| PY_RCO                | C2_11         |  |  | 3.679            | 0.0406   | A rather stable cluster configuration between donor and acceptor, which describes a stage in the Friedel-Crafts acylation               |

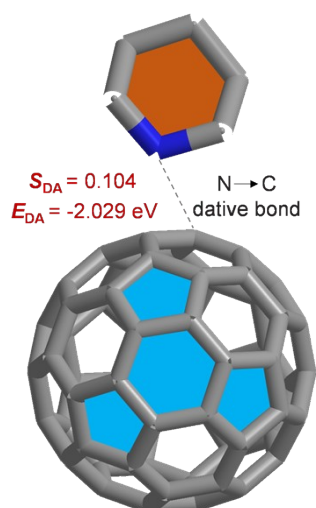

**Figure S1.** Calculated  $S_{DA}$  and  $E_{DA}$  values for the  $C_{60}$ -piperidine complex where a  $N \rightarrow C$  dative bond exists as proposed by Hobza et al.

## REFERENCES

- [1] T. Lu, User manual for Multiwfn version 3.7, section 4.100.15, 2020
- [2] R. B. Grossman and R. Grossman, The art of writing reasonable organic reaction mechanisms , Springer, 2003
