# Supplementary material for: 2D-Graph of intermolecular interactions predicts radical character of anion–π* type charge-transfer complexes
Source: RSC Adv. 2024 Jan 25;14(6):3771–5. doi: 10.1039/d3ra07729b (PMC10809263; doi:10.1039/d3ra07729b)
Supplement: RA-014-D3RA07729B-s001 [file RA-014-D3RA07729B-s001.xlsx]

## Sheet: Sheet1
QTP17						B3LYP/6-311+G**						wb97xd/def2TZVP						wb97xd/may-cc-pVTZ						m062x/def2TZVP
ours-NNI_Ph2C_stacking	-0.047308	-0.093031	1.24419	28.6916	0.158696	ours-NNI_Ph2C_stacking	0.005714	-0.132958	3.77346	87.018	0.165429	ours-NNI_Ph2C_stacking	-0.055333	-0.070069	0.400987	9.24698	0.158806	ours-NNI_Ph2C_stacking	-0.058677	-0.070845	0.331108	7.63553	0.158985	ours-NNI_Ph2C_stacking	-0.030655	-0.102715	1.96085	45.2183	0.15818
cb-H3PO4	-0.136891	-0.499821	9.87583	227.742	0.341625	cb-H3PO4	-0.039364	-0.49981	12.5294	288.934	0.357248	cb-H3PO4	-0.106383	-0.49981	10.7057	246.879	0.346749	cb-H3PO4	-0.11802	-0.49981	10.389	239.577	0.348646	cb-H3PO4	-0.098973	-0.49981	10.9073	251.529	0.341609
ours-NNI_nBu	0.001347	-0.092882	2.5641	59.1296	0.170679	ours-NNI_nBu	0.058868	-0.132854	5.21702	120.307	0.174616	ours-NNI_nBu	0.008354	-0.069929	2.13019	49.1233	0.179793	ours-NNI_nBu	-0.009633	-0.07071	1.66199	38.3264	0.170672	ours-NNI_nBu	0.033325	-0.102624	3.69936	85.3093	0.179226
cb-BF3_NMe3	-0.305426	-0.063853	-6.57354	-151.589	0.318705	cb-BF3_NMe3	-0.219973	-0.123571	-2.62323	-60.4932	0.345442	cb-BF3_NMe3	-0.296461	-0.030723	-7.2311	-166.753	0.326768	cb-BF3_NMe3	-0.297312	-0.035469	-7.12511	-164.309	0.336602	cb-BF3_NMe3	-0.278655	-0.072379	-5.61306	-129.44	0.309566
TS_AD-H2CF3Tone_EtNH2	-0.33177	-0.439572	2.93344	67.6468	0.328375	TS_AD-H2CF3Tone_EtNH2	-0.239819	-0.504365	7.19867	166.005	0.322823	TS_AD-H2CF3Tone_EtNH2	-0.31808	-0.416408	2.67564	61.7017	0.327791	TS_AD-H2CF3Tone_EtNH2	-0.32048	-0.41727	2.63379	60.7366	0.324118	TS_AD-H2CF3Tone_EtNH2	-0.302315	-0.451764	4.06672	93.7807	0.324302
cb-HCN	-0.134379	-0.499821	9.94419	229.318	0.681172	cb-HCN	-0.045378	-0.49981	12.3657	285.16	0.666197	cb-HCN	-0.116091	-0.49981	10.4415	240.787	0.660694	cb-HCN	-0.126383	-0.49981	10.1615	234.329	0.662652	cb-HCN	-0.090924	-0.49981	11.1264	256.58	0.669605
ours-NNI_3	-0.067326	-0.091091	0.646679	14.9128	0.167946	ours-NNI_3	-0.005912	-0.131231	3.41011	78.6389	0.165862	ours-NNI_3	-0.069789	-0.06824	-0.0421505	-0.972012	0.165018	ours-NNI_3	-0.075362	-0.068928	-0.175078	-4.0374	0.163029	ours-NNI_3	-0.044708	-0.101004	1.53189	35.3263	0.167316
TS_SN2-CH3Br_NH3	-0.368961	0.005327	-10.1849	-234.869	0.115246	TS_SN2-CH3Br_NH3	-0.271488	-0.030662	-6.55321	-151.121	0.158281	TS_SN2-CH3Br_NH3	-0.350151	0.060861	-11.1842	-257.914	0.117749	TS_SN2-CH3Br_NH3	-0.35401	0.038341	-10.6764	-246.204	0.148782	TS_SN2-CH3Br_NH3	-0.336427	0.027416	-9.90068	-228.315	0.126587
TS_E2-CH3Br_OH	-0.052446	0.004377	-1.54623	-35.657	0.00180331	TS_E2-CH3Br_OH	0.046839	-0.046691	2.54508	58.691	0.0852664	TS_E2-CH3Br_OH	0.005768	0.035439	-0.807389	-18.6188	0.0631125	TS_E2-CH3Br_OH	-0.044007	0.028077	-1.96151	-45.2334	0.0208961	TS_E2-CH3Br_OH	0.011583	0.002769	0.239841	5.53087	0.00046322
cb-3NO2Ar	-0.179621	-0.499821	8.71309	200.929	0.00333615	cb-3NO2Ar	-0.114361	-0.49981	10.4886	241.873	0.274199	cb-3NO2Ar	-0.17676	-0.49981	8.79064	202.717	0.0296254	cb-3NO2Ar	-0.180166	-0.49981	8.69796	200.58	0.0292917	cb-3NO2Ar	-0.157562	-0.49981	9.31305	214.764	0.00711687
NCBIw-dimer_naphthalene	-0.278786	-0.002679	-7.51326	-173.26	0.026879	NCBIw-dimer_naphthalene	-0.225859	-0.051118	-4.75495	-109.652	0.0249059	NCBIw-dimer_naphthalene	-0.292646	0.016899	-8.42315	-194.242	0.0240608	NCBIw-dimer_naphthalene	-0.292873	0.015574	-8.39327	-193.553	0.024009	NCBIw-dimer_naphthalene	-0.269172	-0.016787	-6.86775	-158.374	0.0252619
wNCBI-2PhBr	-0.316549	0.008512	-8.84536	-203.979	0.0333358	wNCBI-2PhBr	-0.254001	-0.03205	-6.0396	-139.276	0.0343614	wNCBI-2PhBr	-0.32512	0.041123	-9.96598	-229.821	0.0324501	wNCBI-2PhBr	-0.325412	0.037904	-9.88634	-227.984	0.0583278	wNCBI-2PhBr	-0.30117	0.006277	-8.36606	-192.926	0.0320827
cb-iCH4	0.005777	-0.499821	13.758	317.267	0.644878	cb-iCH4	0.06654	-0.49981	15.4112	355.39	0.651242	cb-iCH4	0.021554	-0.49981	14.187	327.161	0.665042	cb-iCH4	-0.009501	-0.49981	13.342	307.674	0.645113	cb-iCH4	0.048741	-0.49981	14.9268	344.221	0.664882
TS-RO	-0.048944	-0.003545	-1.23537	-28.4883	0.169008	TS-RO	0.018827	-0.064435	2.26568	52.2477	0.205755	TS-RO	-0.037929	0.022919	-1.65576	-38.1827	0.245	TS-RO	-0.057669	0.014606	-1.9667	-45.3532	0.176733	TS-RO	-0.012389	-0.006977	-0.147268	-3.39608	0.255017
wNCBI-CH3F_CH3NH2	-0.334822	0.012494	-9.45095	-217.944	0.0493598	wNCBI-CH3F_CH3NH2	-0.242925	0.006499	-6.78718	-156.516	0.147197	wNCBI-CH3F_CH3NH2	-0.320731	0.130613	-12.2817	-283.223	0.00591252	wNCBI-CH3F_CH3NH2	-0.323275	0.064146	-10.5423	-243.11	0.137901	wNCBI-CH3F_CH3NH2	-0.304954	0.08529	-10.6191	-244.882	0.002842
cb-5crSH	-0.290074	-0.499821	5.70751	131.618	0.46552	cb-5crSH	-0.215901	-0.49981	7.72556	178.156	0.469859	cb-5crSH	-0.29173	-0.49981	5.66215	130.572	0.463416	cb-5crSH	-0.293265	-0.49981	5.62038	129.609	0.464594	cb-5crSH	-0.267401	-0.49981	6.32417	145.839	0.464249
TS-DA	-0.283108	0.015894	-8.13626	-187.627	0	TS-DA	-0.225108	-0.031709	-5.26266	-121.36	0.232684	TS-DA	-0.296791	0.049078	-9.41158	-217.036	0.262773	TS-DA	-0.296964	0.043074	-9.25291	-213.377	0.203304	TS-DA	-0.271705	0.016488	-7.84214	-180.844	0.266812
HB-NH3_NH3	-0.368618	0.008714	-10.2677	-236.779	0.105596	HB-NH3_NH3	-0.271186	0.010905	-7.67609	-177.015	0.176606	HB-NH3_NH3	-0.349821	0.107178	-12.4356	-286.771	0.22145	HB-NH3_NH3	-0.353694	0.075011	-11.6657	-269.016	0.163609	HB-NH3_NH3	-0.336088	0.060122	-10.7814	-248.625	0.222564
ours-NNI_PhC	-0.026358	-0.091981	1.78569	41.179	0.161974	ours-NNI_PhC	0.026731	-0.13223	4.32555	99.7495	0.167329	ours-NNI_PhC	-0.033095	-0.068983	0.976563	22.5201	0.164458	ours-NNI_PhC	-0.039326	-0.069787	0.828886	19.1146	0.162256	ours-NNI_PhC	-0.007356	-0.101807	2.57014	59.2689	0.164161
ct-NH3_BH3	-0.367665	-0.042882	-8.8378	-203.804	0.293306	ct-NH3_BH3	-0.270376	-0.10152	-4.59481	-105.959	0.339913	ct-NH3_BH3	-0.34893	-0.017491	-9.01892	-207.981	0.343629	ct-NH3_BH3	-0.352837	-0.019652	-9.06643	-209.077	0.300858	ct-NH3_BH3	-0.335158	-0.056093	-7.59375	-175.116	0.33257
HB-SH2_SH2	-0.345607	0.005783	-9.56181	-220.501	0.115304	HB-SH2_SH2	-0.267659	-0.009582	-7.02264	-161.946	0.18177	HB-SH2_SH2	-0.345337	0.087582	-11.7803	-271.661	0.163182	HB-SH2_SH2	-0.347836	0.069983	-11.3694	-262.185	0.178226	HB-SH2_SH2	-0.319178	0.055077	-10.184	-234.849	0.188015
cb-CH3OH	-0.044914	-0.499821	12.3787	285.458	0.400621	cb-CH3OH	0.050828	-0.49981	14.9836	345.531	0.414406	cb-CH3OH	-0.010514	-0.49981	13.3144	307.038	0.400674	cb-CH3OH	-0.032606	-0.49981	12.7133	293.175	0.409039	cb-CH3OH	-0.000876	-0.49981	13.5767	313.086	0.397512
ours-NNI_Ph3C	-0.048033	-0.062233	0.386402	8.91063	0.0354339	ours-NNI_Ph3C	-0.006858	-0.106969	2.72416	62.8206	0.0317258	ours-NNI_Ph3C	-0.061495	-0.041357	-0.547983	-12.6368	0.033538	ours-NNI_Ph3C	-0.063021	-0.042344	-0.56265	-12.975	0.0318976	ours-NNI_Ph3C	-0.038157	-0.074308	0.983719	22.6851	0.0350436
cpi-Li_HPh	-0.319001	-0.222715	-2.62008	-60.4204	4.866e-05	cpi-Li_HPh	-0.25924	-0.2554	-0.104492	-2.40964	5.098e-05	cpi-Li_HPh	-0.331156	-0.194561	-3.71694	-85.7146	4.107e-05	cpi-Li_HPh	-0.331456	-0.196641	-3.6685	-84.5977	3.935e-05	cpi-Li_HPh	-0.307085	-0.251796	-1.50449	-34.6944	4.65e-05
HB-EtOH_H2O	-0.387409	0.005676	-10.6964	-246.665	0.0166886	HB-EtOH_H2O	-0.284037	0.018114	-8.22195	-189.603	0.115932	HB-EtOH_H2O	-0.36196	0.10233	-12.634	-291.346	0.102125	HB-EtOH_H2O	-0.365065	0.094726	-12.5116	-288.523	0.0668053	HB-EtOH_H2O	-0.354101	0.052663	-11.0686	-255.248	0.0952782
cb-HCF3	-0.023485	-0.499821	12.9618	298.905	0.681895	cb-HCF3	0.048678	-0.49981	14.9251	344.181	0.672073	cb-HCF3	0.004738	-0.49981	13.7295	316.609	0.679095	cb-HCF3	-0.023118	-0.49981	12.9715	299.129	0.67327	cb-HCF3	0.023123	-0.49981	14.2297	328.145	0.684837
HB-CH4_NH3	-0.368499	0.014428	-10.42	-240.29	0.0788643	HB-CH4_NH3	-0.271076	0.009496	-7.63476	-176.062	0.137229	HB-CH4_NH3	-0.349703	0.128642	-13.0164	-300.166	0.179115	HB-CH4_NH3	-0.353579	0.071021	-11.554	-266.44	0.124606	HB-CH4_NH3	-0.33597	0.086239	-11.4889	-264.94	0.18252
HB-H2O_HF	-0.436656	0.004934	-12.0163	-277.102	0.0739458	HB-H2O_HF	-0.32267	-0.002714	-8.70645	-200.775	0.190986	HB-H2O_HF	-0.399868	0.099537	-13.5895	-313.381	0.188887	HB-H2O_HF	-0.405868	0.100257	-13.7724	-317.598	0.193603	HB-H2O_HF	-0.398093	0.046927	-12.1096	-279.254	0.187409
cb-BF3_NH3	-0.365136	-0.054034	-8.46552	-195.219	0.336704	cb-BF3_NH3	-0.268161	-0.113333	-4.21309	-97.156	0.388708	cb-BF3_NH3	-0.346512	-0.020279	-8.87726	-204.714	0.390293	cb-BF3_NH3	-0.350514	-0.025656	-8.83984	-203.851	0.350468	cb-BF3_NH3	-0.33267	-0.062172	-7.36063	-169.74	0.372778
cb-itBuH	0.005856	-0.499821	13.7602	317.317	0.595976	cb-itBuH	0.061089	-0.49981	15.2628	351.969	0.597912	cb-itBuH	0.013282	-0.49981	13.962	321.97	0.606019	cb-itBuH	-0.003567	-0.49981	13.5035	311.397	0.60051	cb-itBuH	0.038436	-0.49981	14.6464	337.754	0.605237
ct-per_4F2CN6Cr	-0.236469	-0.178842	-1.56811	-36.1615	0.0459333	ct-per_4F2CN6Cr	-0.192838	-0.209991	0.466757	10.7637	0.0425406	ct-per_4F2CN6Cr	-0.251943	-0.153525	-2.67809	-61.7582	0.0425287	ct-per_4F2CN6Cr	-0.25211	-0.153948	-2.67113	-61.5976	0.0419348	ct-per_4F2CN6Cr	-0.230064	-0.183704	-1.26152	-29.0913	0.0449497
TS_AD-MeCN_Me	0.003603	-0.031698	0.96059	22.1517	0.229114	TS_AD-MeCN_Me	0.064863	-0.093491	4.30903	99.3686	0.260697	TS_AD-MeCN_Me	0.018753	-0.01074	0.802546	18.5071	0.263024	TS_AD-MeCN_Me	-0.011221	-0.01461	0.0922194	2.12663	0.254175	TS_AD-MeCN_Me	0.045907	-0.03883	2.30581	53.1733	0.258847
ours-NNI_2	-0.072612	-0.091102	0.503139	11.6026	0.166858	ours-NNI_2	-0.012301	-0.131223	3.23603	74.6247	0.163977	ours-NNI_2	-0.07532	-0.06826	-0.192112	-4.43022	0.164461	ours-NNI_2	-0.080654	-0.068945	-0.318618	-7.34751	0.162209	ours-NNI_2	-0.050673	-0.10101	1.36974	31.5869	0.166505
PY_RCO	-0.255361	-0.268911	0.368714	8.50275	0.0431145	PY_RCO	-0.208539	-0.343731	3.67876	84.8343	0.0406266	PY_RCO	-0.269264	-0.258889	-0.282318	-6.51041	0.038638	PY_RCO	-0.269462	-0.258901	-0.28738	-6.62713	0.0392975	PY_RCO	-0.247517	-0.286805	1.06908	24.6536	0.0414768
ct-TTF_TCNQ	-0.227411	-0.156615	-1.92646	-44.4252	0.0244771	ct-TTF_TCNQ	-0.172328	-0.190804	0.502758	11.5939	0.022323	ct-TTF_TCNQ	-0.236726	-0.134779	-2.77412	-63.9727	0.0237078	ct-TTF_TCNQ	-0.238546	-0.134957	-2.8188	-65.0031	0.0229148	ct-TTF_TCNQ	-0.210924	-0.164257	-1.26987	-29.284	0.0247955
ours-NNI_CCl3	-0.081408	-0.088829	0.201936	4.65675	0.181618	ours-NNI_CCl3	-0.008819	-0.129585	3.28621	75.7818	0.19273	ours-NNI_CCl3	-0.07229	-0.066128	-0.167677	-3.86671	0.176718	ours-NNI_CCl3	-0.081792	-0.066932	-0.404361	-9.32479	0.183197	ours-NNI_CCl3	-0.049232	-0.098878	1.35094	31.1533	0.17608
wNCBI-2CH4	-0.486127	0.014453	-13.6215	-314.119	3.845e-05	wNCBI-2CH4	-0.395276	0.009548	-11.0158	-254.031	3.008e-05	wNCBI-2CH4	-0.476415	0.128785	-16.4683	-379.769	0.00014476	wNCBI-2CH4	-0.475928	0.071044	-14.8839	-343.23	0.00014824	wNCBI-2CH4	-0.455212	0.086341	-14.7364	-339.83	6.26e-05
cb-4me6crNH	-0.033868	-0.499821	12.6792	292.39	0.348833	cb-4me6crNH	0.036319	-0.49981	14.5888	336.426	0.350545	cb-4me6crNH	-0.026112	-0.49981	12.89	297.25	0.344277	cb-4me6crNH	-0.033925	-0.49981	12.6774	292.347	0.349207	cb-4me6crNH	-0.0085	-0.49981	13.3692	308.302	0.344388
ct-2MeNPh_4F2CN6Cr	-0.214194	-0.18194	-0.877676	-20.2397	0.0729392	ct-2MeNPh_4F2CN6Cr	-0.157371	-0.212182	1.49148	34.3944	0.0690008	ct-2MeNPh_4F2CN6Cr	-0.222841	-0.156488	-1.80556	-41.6371	0.0665863	ct-2MeNPh_4F2CN6Cr	-0.223256	-0.156909	-1.80539	-41.6334	0.0671144	ct-2MeNPh_4F2CN6Cr	-0.200303	-0.186512	-0.375272	-8.65398	0.0703085
cb-BOH3_NH3	-0.36427	-0.008596	-9.67839	-223.189	0.176845	cb-BOH3_NH3	-0.267369	-0.052091	-5.85802	-135.089	0.285172	cb-BOH3_NH3	-0.345656	0.041119	-10.5247	-242.705	0.316628	cb-BOH3_NH3	-0.349692	0.021547	-10.1019	-232.956	0.212174	cb-BOH3_NH3	-0.331807	-6e-06	-9.02877	-208.208	0.293845
cb-2CF32T	-0.115997	-0.499821	10.4444	240.853	0.562097	cb-2CF32T	-0.048721	-0.49981	12.2748	283.063	0.549211	cb-2CF32T	-0.113414	-0.49981	10.5144	242.467	0.549778	cb-2CF32T	-0.117818	-0.49981	10.3945	239.704	0.550326	cb-2CF32T	-0.090524	-0.49981	11.1372	256.831	0.556079
ct-pentacene_4F2CN6Cr	-0.218712	-0.178362	-1.09798	-25.32	0.0179214	ct-pentacene_4F2CN6Cr	-0.17893	-0.209686	0.836914	19.2997	0.0171473	ct-pentacene_4F2CN6Cr	-0.235846	-0.152748	-2.26121	-52.1448	0.0165196	ct-pentacene_4F2CN6Cr	-0.236008	-0.153204	-2.25321	-51.9603	0.0155804	ct-pentacene_4F2CN6Cr	-0.213496	-0.183157	-0.825567	-19.038	0.0180679
cpi-NH4_HPh	-0.319228	-0.19345	-3.4226	-78.9269	5.222e-05	cpi-NH4_HPh	-0.259409	-0.235833	-0.641536	-14.7942	9.7e-05	cpi-NH4_HPh	-0.331361	-0.142697	-5.13381	-118.388	5.602e-05	cpi-NH4_HPh	-0.331652	-0.153967	-4.83506	-111.499	8.246e-05	cpi-NH4_HPh	-0.307308	-0.195104	-3.05323	-70.4091	6.45e-05
TS_AD-BH3_ene	-0.301349	-0.050126	-6.83613	-157.645	0.21358	TS_AD-BH3_ene	-0.237135	-0.109575	-3.47109	-80.0451	0.24191	TS_AD-BH3_ene	-0.311107	-0.025103	-7.78257	-179.47	0.239718	TS_AD-BH3_ene	-0.311171	-0.026818	-7.73764	-178.434	0.220777	TS_AD-BH3_ene	-0.286797	-0.06432	-6.05391	-139.606	0.231205
ct-DBTTF_4F2CN6Cr	-0.230638	-0.180577	-1.36223	-31.4137	0.0391841	ct-DBTTF_4F2CN6Cr	-0.177228	-0.21119	0.924154	21.3115	0.036043	ct-DBTTF_4F2CN6Cr	-0.240616	-0.155201	-2.32426	-53.5987	0.0361575	ct-DBTTF_4F2CN6Cr	-0.241984	-0.155621	-2.35006	-54.1936	0.0361749	ct-DBTTF_4F2CN6Cr	-0.215865	-0.185273	-0.832451	-19.1968	0.0382193
cb-F3CSO3H	-0.182087	-0.499821	8.64599	199.381	0.350427	cb-F3CSO3H	-0.076895	-0.49981	11.5081	265.383	0.358447	cb-F3CSO3H	-0.14716	-0.49981	9.5961	221.291	0.350432	cb-F3CSO3H	-0.15527	-0.49981	9.37542	216.202	0.353893	cb-F3CSO3H	-0.14313	-0.49981	9.70576	223.82	0.349545
cb-ea	-0.04408	-0.368233	8.82066	203.409	0.206763	cb-ea	0.052547	-0.439971	13.4021	309.06	0.21297	cb-ea	-0.008019	-0.355802	9.46366	218.237	0.216351	cb-ea	-0.031434	-0.355656	8.82253	203.452	0.215066	cb-ea	0.001019	-0.382899	10.4469	240.912	0.208978
cb_iPH3	-0.020743	-0.499821	13.0364	300.626	0.545889	cb_iPH3	0.035088	-0.49981	14.5553	335.654	0.55116	cb_iPH3	-0.015132	-0.49981	13.1888	304.14	0.5551	cb_iPH3	-0.037866	-0.49981	12.5701	289.874	0.547204	cb_iPH3	0.01668	-0.49981	14.0544	324.102	0.55584
ct-Tetracene_TCNQ	-0.233277	-0.156545	-2.08799	-48.1501	0.0487438	ct-Tetracene_TCNQ	-0.189912	-0.190776	0.0235106	0.542168	0.0447114	ct-Tetracene_TCNQ	-0.249494	-0.13471	-3.12343	-72.028	0.0450416	ct-Tetracene_TCNQ	-0.249672	-0.134885	-3.12351	-72.0299	0.0441936	ct-Tetracene_TCNQ	-0.226839	-0.164203	-1.70441	-39.3047	0.0473588
ct-py_tcne	-0.254782	-0.151156	-2.81981	-65.0263	0.0422993	ct-py_tcne	-0.208075	-0.195051	-0.354401	-8.17268	0.037307	ct-py_tcne	-0.268732	-0.128348	-3.82005	-88.0923	0.0370608	ct-py_tcne	-0.268928	-0.12842	-3.82342	-88.1701	0.0366851	ct-py_tcne	-0.246986	-0.15949	-2.38089	-54.9046	0.0388454
cb-5crOH	-0.348319	-0.499821	4.12258	95.0689	0.227239	cb-5crOH	-0.246551	-0.49981	6.89153	158.922	0.247597	cb-5crOH	-0.325586	-0.49981	4.74088	109.327	0.237336	cb-5crOH	-0.327177	-0.49981	4.69759	108.329	0.240511	cb-5crOH	-0.317938	-0.49981	4.94899	114.126	0.228369
TS_AD-Et_ea	0.013486	-0.064228	2.11471	48.7663	0.282939	TS_AD-Et_ea	0.077017	-0.125963	5.52337	127.372	0.284879	TS_AD-Et_ea	0.024432	-0.044742	1.88232	43.4073	0.284953	TS_AD-Et_ea	0.001816	-0.046901	1.32566	30.5704	0.288277	TS_AD-Et_ea	0.050447	-0.076117	3.44398	79.4201	0.28045
HB-H2O_Cl	-0.10678	0.004795	-3.03611	-70.0144	0.121974	HB-H2O_Cl	-0.027365	0.015205	-1.15839	-26.7131	0.170621	HB-H2O_Cl	-0.080423	0.099654	-4.90015	-113	0.0054107	HB-H2O_Cl	-0.107397	0.09248	-5.43893	-125.425	0.114133	HB-H2O_Cl	-0.058611	0.0505	-2.96906	-68.4682	0.279399
TS_AD-PhCHO_CN	-0.134956	-0.056847	-2.12546	-49.0141	0.349889	TS_AD-PhCHO_CN	-0.045838	-0.115856	1.90529	43.937	0.322037	TS_AD-PhCHO_CN	-0.116471	-0.03957	-2.09258	-48.2561	0.317004	TS_AD-PhCHO_CN	-0.126829	-0.041242	-2.32894	-53.7066	0.325028	TS_AD-PhCHO_CN	-0.091336	-0.070324	-0.571766	-13.1852	0.323969
TS_SN2-OH_CH3Cl	-0.052452	0.006817	-1.61279	-37.1919	0.0429915	TS_SN2-OH_CH3Cl	0.046836	-0.025403	1.96572	45.3307	0.102492	TS_SN2-OH_CH3Cl	0.005754	0.068269	-1.70112	-39.2288	0.0318909	TS_SN2-OH_CH3Cl	-0.044009	0.04437	-2.40492	-55.4587	0.11705	TS_SN2-OH_CH3Cl	0.011568	0.03657	-0.680339	-15.689	0.114207
cpi-Ar_menh3	-0.319293	-0.174596	-3.93741	-90.7987	0.00108778	cpi-Ar_menh3	-0.259461	-0.217629	-1.13831	-26.25	0.00143757	cpi-Ar_menh3	-0.33142	-0.123544	-5.6566	-130.444	0.00196252	cpi-Ar_menh3	-0.331711	-0.139012	-5.24361	-120.92	0.00123821	cpi-Ar_menh3	-0.30737	-0.174671	-3.61093	-83.2699	0.00184886
ours-NNI_1	-0.073586	-0.091603	0.490268	11.3058	0.160655	ours-NNI_1	-0.01435	-0.131596	3.19043	73.573	0.15538	ours-NNI_1	-0.076147	-0.068743	-0.201473	-4.64608	0.159361	ours-NNI_1	-0.081153	-0.069418	-0.319326	-7.36382	0.155423	ours-NNI_1	-0.05203	-0.101431	1.34427	30.9996	0.161697
ct-2MeNPh_4NO22CN6Cr	-0.208303	-0.218249	0.270645	6.24121	0.0667227	ct-2MeNPh_4NO22CN6Cr	-0.152491	-0.24471	2.50941	57.8683	0.0626687	ct-2MeNPh_4NO22CN6Cr	-0.217564	-0.191076	-0.720776	-16.6215	0.0606302	ct-2MeNPh_4NO22CN6Cr	-0.217977	-0.191413	-0.722844	-16.6692	0.0614534	ct-2MeNPh_4NO22CN6Cr	-0.194802	-0.222926	0.765293	17.6481	0.0640072
ours-NNI_7	-0.064916	-0.091022	0.710381	16.3818	0.166873	ours-NNI_7	-0.003467	-0.131162	3.47476	80.1298	0.16462	ours-NNI_7	-0.067317	-0.068189	0.0237283	0.547188	0.164714	ours-NNI_7	-0.073042	-0.068872	-0.113472	-2.61671	0.162258	ours-NNI_7	-0.042347	-0.100937	1.59432	36.7658	0.166845
ours-NNI_4	-0.058266	-0.092891	0.942195	21.7275	0.164948	ours-NNI_4	0.001175	-0.132861	3.64731	84.1088	0.160805	ours-NNI_4	-0.062177	-0.069841	0.208548	4.80923	0.162882	ours-NNI_4	-0.067833	-0.070536	0.0735524	1.69616	0.160285	ours-NNI_4	-0.036615	-0.10266	1.79718	41.4439	0.164531
wNCBI-2PhH	-0.320195	0.011947	-9.03805	-208.422	0.00178293	wNCBI-2PhH	-0.260175	-0.017372	-6.60701	-152.361	0.0648933	wNCBI-2PhH	-0.332225	0.056561	-10.5794	-243.967	0.0605529	wNCBI-2PhH	-0.332505	0.053095	-10.4927	-241.968	0.0654445	wNCBI-2PhH	-0.30823	0.022146	-8.98999	-207.314	0.0633599
HB-H2O	-0.436851	0.005714	-12.0428	-277.714	0.0507268	HB-H2O	-0.322821	0.018325	-9.28306	-214.072	0.152912	HB-H2O	-0.400042	0.102517	-13.6753	-315.36	0.142273	HB-H2O	-0.406024	0.09479	-13.6279	-314.265	0.0889118	HB-H2O	-0.398287	0.052798	-12.2747	-283.06	0.142398
cb-5cAr	-0.044098	-0.499821	12.4009	285.97	0.53161	cb-5cAr	0.013074	-0.49981	13.9563	321.84	0.533251	cb-5cAr	-0.050238	-0.49981	12.2335	282.111	0.525742	cb-5cAr	-0.057012	-0.49981	12.0492	277.86	0.529561	cb-5cAr	-0.023531	-0.49981	12.9602	298.87	0.525912
ours-NNI_9	-0.060084	-0.091453	0.853594	19.6843	0.166827	ours-NNI_9	0.001253	-0.131504	3.6125	83.3063	0.164188	ours-NNI_9	-0.062829	-0.068603	0.157119	3.62324	0.164192	ours-NNI_9	-0.068713	-0.069286	0.0155921	0.359563	0.161922	ours-NNI_9	-0.03758	-0.101333	1.73481	40.0056	0.166492
wNCBI-CH3Br_CH3NH2	-0.334655	0.005243	-9.2491	-213.289	0.0850638	wNCBI-CH3Br_CH3NH2	-0.242779	-0.031047	-5.76152	-132.864	0.135342	wNCBI-CH3Br_CH3NH2	-0.320573	0.060307	-10.3643	-239.006	0.107838	wNCBI-CH3Br_CH3NH2	-0.323121	0.038071	-9.82854	-226.651	0.123628	wNCBI-CH3Br_CH3NH2	-0.304791	0.02689	-9.0255	-208.133	0.110597
TS_AD-3_2	-0.308185	-0.098914	-5.69456	-131.32	0.255769	TS_AD-3_2	-0.244093	-0.154686	-2.43289	-56.1037	0.262923	TS_AD-3_2	-0.31706	-0.0753	-6.57863	-151.707	0.260623	TS_AD-3_2	-0.317502	-0.077492	-6.53101	-150.609	0.25563	TS_AD-3_2	-0.292914	-0.105692	-5.09457	-117.484	0.257606
ours-NNI_tBuO	-0.06656	-0.08997	0.637019	14.69	0.0962013	ours-NNI_tBuO	0.021093	-0.130437	4.12334	95.0865	0.101962	ours-NNI_tBuO	-0.039881	-0.067248	0.744694	17.173	0.105641	ours-NNI_tBuO	-0.055062	-0.068038	0.353095	8.14256	0.097524	ours-NNI_tBuO	-0.030859	-0.099901	1.87873	43.3245	0.104716
cb-H2NPh	-0.043809	-0.499821	12.4087	286.152	0.197529	cb-H2NPh	0.014646	-0.49981	13.9991	322.826	0.242674	cb-H2NPh	-0.045759	-0.49981	12.3554	284.921	0.222052	cb-H2NPh	-0.05338	-0.49981	12.148	280.139	0.223052	cb-H2NPh	-0.022899	-0.49981	12.9774	299.266	0.210933
ours-PyPh_PhMe	-0.026573	-0.242877	5.88593	135.733	0.18697	ours-PyPh_PhMe	0.026712	-0.287585	8.55246	197.224	0.194147	ours-PyPh_PhMe	-0.03317	-0.221939	5.13667	118.454	0.196168	ours-PyPh_PhMe	-0.03945	-0.221875	4.96404	114.473	0.19078	ours-PyPh_PhMe	-0.007449	-0.254236	6.71542	154.861	0.193521
ours-NNI_PhO	-0.07253	-0.086862	0.389994	8.99346	0.00844805	ours-NNI_PhO	-0.009864	-0.127796	3.20909	74.0034	0.00834355	ours-NNI_PhO	-0.072316	-0.064353	-0.216684	-4.99686	0.00755988	ours-NNI_PhO	-0.078628	-0.065156	-0.366592	-8.45381	0.00810459	ours-NNI_PhO	-0.05128	-0.097046	1.24536	28.7186	0.00740038
TS_SNAr-ClTNT_OH	-0.052459	-0.174326	3.31617	76.4727	0.155452	TS_SNAr-ClTNT_OH	0.046832	-0.217633	7.19646	165.954	0.157153	TS_SNAr-ClTNT_OH	0.005737	-0.145694	4.12065	95.0244	0.171244	TS_SNAr-ClTNT_OH	-0.044012	-0.147197	2.80781	64.7496	0.153891	TS_SNAr-ClTNT_OH	0.011551	-0.180023	5.213	120.214	0.171812
wNCBI-CH3Cl_CH3NH2	-0.334724	0.008838	-9.3488	-215.588	0.0686647	wNCBI-CH3Cl_CH3NH2	-0.24284	-0.011539	-6.29402	-145.144	0.168604	wNCBI-CH3Cl_CH3NH2	-0.320639	0.089175	-11.1516	-257.162	0.125082	wNCBI-CH3Cl_CH3NH2	-0.323185	0.053256	-10.2435	-236.22	0.152569	wNCBI-CH3Cl_CH3NH2	-0.304859	0.055821	-9.81461	-226.33	0.12698
